# Supplementary material
Source: Elsevier journal article supplement (https://www.sciencedirect.com/science/article/pii/S0300289622004860)
Supplement: mmc1 [file S0300289622004860:mmc1.pdf]

## CARTA CIENTÍFICA

### **Clasificación de la gravedad de las agudizaciones de la EPOC en pacientes ingresados según los criterios de Roma Vs GesEPOC.**

Carlos Amado Diago a,f,g, Juan Marco Figueira Gonçalves b, h, Rafael Golpe c, Cristóbal Esteban d,e, Ignacio García Talavera b, Sergio García-Martin a.

a Servicio de Neumología del Hospital Universitario Marqués de Valdecilla. Santander. España

b Servicio de Neumología y Cirugía Torácica. Hospital Universitario Nuestra Señora de La Candelaria. Santa Cruz de Tenerife, España.

c Servicio de Neumología. Hospital Universitario Lucus Augusti. Lugo, España.

Servicio de Neumología. Hospital Galdakao-Usansolo. Bizkaia, España.

Red de Investigación en Servicios de Salud en Enfermedades Crónicas (REDISSEC).

Hospital Galdakao-Usansolo. Bizkaia, España

f Universidad de Cantabria

g Instituto de investigación sanitaria IDIVAL.

h Instituto Universitario de Enfermedades Tropicales y Salud Pública de Canarias,

Universidad de la Laguna, Santa Cruz de Tenerife, España

**Corresponding author:** Carlos A. Amado

**Address:** Department of Pulmonology, Hospital Universitario Marqués de Valdecilla. Av Valdecilla SN 39005 Santander (SPAIN)

**email:** [carlosantonio.amado@scsalud.es](mailto:carlosantonio.amado@scsalud.es)

**Competing interests statement:** Los autores declaran los conflictos de intereses en el manuscrito: Juan Marco Figueira Gonçalves ha recibido honorarios como ponente o financiación para asistencia a congresos de Laboratorio Esteve, Mundipharma, AstraZeneca, Boehringer Ingelheim, Ferrer, Menarini, Rovi, GlaxoSmithKline, Chiesi, Novartis y Gebro Pharma. Rafael Golpe ha recibido honorarios como ponente o financiación para asistencia a congresos de Laboratorio Esteve, Mundipharma, AstraZeneca, Boehringer Ingelheim, Ferrer, Menarini, Rovi, GlaxoSmithKline, Chiesi, Novartis y Gebro Pharma. Cristóbal Esteban ha recibido honorarios como ponente o ayudas de investigación de GlaxoSmithKline, Menarini y AstraZeneca. Carlos Amado Diago ha recibido honorarios por impartir conferencias y/o por asesoría científica de Boehringer Ingelheim, Pfizer, AstraZeneca, Novartis, Chiesi, Faes Farma, Esteve y GlaxoSmithKline. Ignacio García Talavera ha recibido honorarios por parte de GSK, AstraZeneca, Pfizer, Chiesi y Grifols en relación con ponencias, estudios y/o asesorías científicas. Sergio García Martín no refiere conflictos de interés.

### ***Al Director:***

Las agudizaciones de la enfermedad pulmonar obstructiva crónica (AEPOC) impactan en la historia natural de la enfermedad (1). La última edición del documento de consenso de la Iniciativa Global para la Enfermedad Pulmonar Obstructiva Crónica (GOLD) (2) cataloga la gravedad de la agudización en base al tratamiento pautado y/o los recursos sanitarios utilizados. Sin embargo, recientemente se han realizado nuevas propuestas para clasificar la gravedad de las AEPOC. La guía española de la enfermedad pulmonar obstructiva crónica (GesEPOC) 2021 (3) propone una nueva clasificación de las exacerbaciones basándose en la estratificación de riesgo basal, el grado de disnea de la medical research council modificado (mMRC), la alteración del nivel de consciencia, la frecuencia respiratoria y el intercambio de gases. En base a estas variables las AEPOC serán catalogadas como leve, moderada, grave o muy grave (considerando los 2 últimos tipos como exacerbaciones hospitalarias). Recientemente, un grupo de expertos ha propuesto otra clasificación que, en base a 5 variables (disnea determinada por escala visual analógica (EVA), frecuencia respiratoria, frecuencia cardíaca, proteína C reactiva e intercambio de gases) categorizan las agudizaciones en leve, moderada o grave (4). Esta clasificación difiere de la de GesEPOC en que no considera la situación basal del enfermo y que requiere que se cumplan al menos 3 criterios para escalar de gravedad leve a moderada. En consecuencia, es previsible que existan discordancias a la hora de etiquetar la gravedad de AEPOC. Sin embargo esta hipótesis no ha sido explorada.

Los objetivos del presente estudio son 1) evaluar la concordancia global entre los criterios propuestos por GesEPOC 2021 y la propuesta de Roma y 2) analizar el grado de concordancia entre las dos propuestas en cuanto al número de eventos graves (ingresos o fallecimientos durante la hospitalización) y en base a la puntuación de la escala DECAF (5). Para ello

realizamos un estudio retrospectivo que fue aprobado por el comité de ética de nuestra institución, en el que se incluyeron pacientes diagnosticados previamente de EPOC ingresados por AEPOC en un hospital de tercer nivel entre 2020 y 2021 de forma consecutiva. Se analizaron las siguientes variables que aparecen recogidas de forma rutinaria en las historias clínicas de nuestro centro: 1) situación basal del paciente: edad, sexo, volumen espiratorio forzado en el primer segundo (FEV1) % postbroncodilatador; clasificación del paciente según el historial de agudizaciones previas como exacerbador ( $\geq 2$  exacerbaciones tratadas con esteroides y/o antibióticos o un ingreso por AEPOC el año previo) o no exacerbador (no cumplía lo anterior); grado de disnea basal según la escala mMRC y calidad de vida según COPD assessment test (CAT). De acuerdo con GesEPOC 2021, se clasificó a los pacientes en alto riesgo (ante cualquiera de los siguientes criterios: FEV1% < 50%, mMRC >1, paciente exacerbador) o bajo riesgo (cumple todos los criterios: FEV1%  $\geq$  50%, mMRC 0-1, y paciente no agudizador). 2) situación a su llegada a urgencias: Escala de disnea de la mMRC extendida, eosinofilia en sangre, consolidación en la radiografía de tórax, valores gasométricos, fibrilación auricular, nivel de consciencia, frecuencia respiratoria y cardiaca, saturación de oxígeno, y niveles de Proteína C reactiva. La escala de Roma propone utilizar la escala EVA para categorizar las agudizaciones. Esta escala no se utiliza de forma rutinaria por lo que este criterio se cambió por aumento de un punto en el grado de disnea según la escala mMRC, basándonos en la existencia de un cierto grado de correlación entre ambas escalas (6). Los pacientes fueron clasificados en función de las distintas propuestas y se calculó la puntuación de la escala predictora de mortalidad en ingresos por AEPOC (DECAF: Disnea, Eosinopenia, consolidación, acidosis y fibrilación auricular); una puntuación más alta en esta escala se asocia a mayor mortalidad en los pacientes ingresados por AEPOC. También se recogió el número de pacientes que presentaron eventos graves (ingreso en UCI o

fallecimiento durante la hospitalización.

Se incluyeron 200 pacientes que ingresaron en este tiempo (10 casos fueron excluidos por falta de variables para calcular las escalas). El 67,5% fueron hombres, con una edad de 75,1 $\pm$ 10,9 años, FEV1 % postbroncodilatador de 49 (34-65)%, su CAT en su última consulta previa en situación estable era de 12,0 $\pm$ 9,3 puntos, 24 pacientes (12%) eran EPOC de bajo riesgo según GesEPOC y 137 (68,5%) eran exacerbadores.

La tabla 1 muestra la concordancia global entre la clasificación para las AEPOC según GesEPOC y según los criterios de Roma. Los criterios de GesEPOC categorizaron como leves o moderadas al 3% de las agudizaciones que ingresaron, mientras que los criterios de Roma categorizaron como leves a un 24%. El grado de concordancia entre las 2 clasificaciones fue Kappa: -0.157, IC95% -0.109 – -0.205,  $p < 0.001$ . Juntando las agudizaciones leves y moderadas de GesEPOC, el índice Kappa se modificaba a 0.481, IC95% (0.382 - 0.585),  $p < 0.001$ .

Por otra parte la tabla 2 muestra que la incidencia de eventos graves (ingreso en UCI o muerte durante el ingreso) en las agudizaciones moderadas de Roma y las graves de GesEPOC es igual, 5 (23.8%) y también es igual en las graves de Roma y las muy graves de GesEPOC, 16 (76.2%). La puntuación en la escala DECAF fue la misma entre las agudizaciones moderadas de Roma y las graves de GesEPOC 1 (1-2) y entre las graves de Roma y las muy graves de GesEPOC 2 (2-3).

En nuestro estudio mostramos cómo existe una discordancia entre ambas escalas, especialmente en aquellas AEPOC etiquetadas como leves. Esto puede ser debido a 2

motivos: 1) GesEPOC -a diferencia de la propuesta de ROMA- incluye la situación basal del paciente para categorizar a los pacientes como leves, una variable que se tiene en cuenta en la toma de decisiones clínicas, 2) para aumentar en la gravedad de la escala de Roma es necesario cumplir 3 de sus criterios de gravedad, mientras que GesEPOC aumenta su gravedad al cumplir uno solo de sus criterios. Este hecho justificaría las puntuaciones más bajas del DECAF en el grupo de pacientes con agudizaciones leves de GesEPOC, comparado con la propuesta de ROMA.

El estudio actual presenta varias limitaciones: 1) se trata de un estudio retrospectivo, realizado en base a los datos de un solo centro, en el que pueden influir elementos locales; 2) solo permite evaluar la aplicabilidad de los criterios en el ámbito hospitalario y no en el ámbito de la atención primaria; 3) la escala EVA no se utilizó para categorizar a los pacientes como se recomienda en la escala de Roma, sino una definición alternativa basada en la modificación del grado funcional basal. Esta modificación tiene un bajo impacto en nuestra muestra ya que solo podría modificar la clasificación de una agudización leve a una moderada (0,5%), y en 19 pacientes (9,5%) podrían cambiar su clasificación de moderada a leve en función de la escala EVA.

Este es el primer estudio que evalúa las diferencias entre las dos nuevas escalas que clasifican la gravedad de las agudizaciones de la EPOC, valora la incidencia de eventos graves en las clasificaciones y ayuda a interpretar mejor ambas propuestas. Existe una concordancia moderada entre las 2 clasificaciones si juntamos las agudizaciones leves y moderadas de GesEPOC. Sin embargo, encontramos un número importante de agudizaciones leves según la propuesta de Roma entre los pacientes ingresados, además de un número no despreciable

de agudizaciones moderadas según la escala de Roma con posterior desarrollo de eventos graves durante el ingreso. La diferenciación de GesEPOC entre estadios graves y muy graves puede resultar útil en el entorno en el que se ha realizado el estudio actual ya que separa bien los eventos graves y el índice DECAF mientras que la clasificación de Roma carece de esta capacidad. Los autores de estas propuestas definen solo parcialmente la utilidad de los niveles de gravedad para la toma de decisiones clínicas. GesEPOC sí establece qué nivel asistencial debería encargarse de cada nivel de gravedad, pero no Roma, además ninguno de los dos establece claramente las opciones terapéuticas en cada escalón. La situación basal de los pacientes es usada habitualmente en la práctica clínica para la toma de decisiones, lo que parece otorgar mayor precisión a GesEPOC, aunque esto puede tener más relevancia en las agudizaciones tratadas de forma ambulatoria, que no son objetivo de este estudio. Queda pendiente una validación prospectiva de las distintas escalas propuestas y una definición más profunda de su utilidad a nivel pronóstico y a nivel de su implicación para tomar decisiones terapéuticas.

## **BIBLIOGRAFÍA**

- 1.- Soler-Cataluña JJ, Martínez-García MA, Sánchez LS, et al. Severe exacerbations and BODE index: two independent risk factors for death in male COPD patients. *Respir Med*. 2009;103:692-9.
- 2.- Global Initiative for Chronic Obstructive Lung Disease [Internet]. Fontana, WI: GOLD;

2022 [consultado Abril 2022]. Disponible en: <https://goldcopd.org/>

3.- Soler-Cataluña JJ, Piñera P, Trigueros JA, et al. Spanish COPD Guidelines (GesEPOC) 2021 Update Diagnosis and Treatment af COPD Exacerbation Syndrome. Arch Bronconeumol (Engl Ed). 2022;58:159-70.

4.- Celli BR, Fabbri LM, Aaron SD, et al. An Updated Definition and Severity Classification of Chronic Obstructive Pulmonary Disease Exacerbations: The Rome Proposal. Am J Respir Crit Care Med. 2021;204:1251-1258.

5.- Steer J, Norman EM, Afolabi OA, et al. Dyspnoea severity and pneumonia as predictors of in-hospital mortality and early readmission in acute exacerbations of COPD. Thorax. 2012;67:117-21.

6.- de Torres JP, Casanova C, Montejo de Garcini A, Aguirre-Jaime A, Celli BR. Gender and respiratory factors associated with dyspnea in chronic obstructive pulmonary disease. Respir Res. 2007;8:18.

**Tabla 1:** Concordancia global entre los grupos según clasificación de ROMA y GesEPOC en pacientes ingresados por agudización de EPOC.

|  |                  | Criterios de Roma |          |       | Total GesEPOC n(%) |
|--|------------------|-------------------|----------|-------|--------------------|
|  |                  | leve              | Moderada | Grave |                    |
|  | <b>Leve n(%)</b> | 2 (1)             | 1 (0.5)  | 0 (0) | <b>3 (1.5)</b>     |



|                                  |                       |                |                 |                |                 |
|----------------------------------|-----------------------|----------------|-----------------|----------------|-----------------|
| <b>Clasificación<br/>GesEPOC</b> | <b>Moderada n(%)</b>  | 2 (1)          | 1 (0.5)         | 0 (0)          | <b>3 (1.5)</b>  |
|                                  | <b>Grave n(%)</b>     | 43 (21.5)      | 105 (52.5)      | 8 (4)          | <b>156 (78)</b> |
|                                  | <b>Muy grave n(%)</b> | 1 (0.5)        | 1 (0.5)         | 36 (18)        | <b>38 (19)</b>  |
| <b>TOTAL ROMA n(%)</b>           |                       | <b>48 (24)</b> | <b>108 (54)</b> | <b>44 (22)</b> | <b>200</b>      |

**Tabla 2:** Incidencia de eventos graves durante el ingreso y puntuación de la escala DECAF en los pacientes según las distintas clasificaciones.

| <b>Gravedad</b> | <b>ROMA (Incidencia de eventos graves)<br/>n(%)</b> | <b>GesEPOC (Incidencia de eventos graves)<br/>n(%)</b> | <b>ROMA (puntuación DECAF)</b> | <b>GesEPOC (puntuación DECAF)</b> |
|-----------------|-----------------------------------------------------|--------------------------------------------------------|--------------------------------|-----------------------------------|
| <b>Leve</b>     | 0 (0)                                               | 0 (0)                                                  | 1 (1-2)                        | 0 (0-1)                           |

|                  |           |           |         |         |
|------------------|-----------|-----------|---------|---------|
| <b>Moderada</b>  | 5 (23.8)  | 0 (0)     | 1 (1-2) | 0 (0-1) |
| <b>Grave</b>     | 16 (76.2) | 5 (23.8)  | 2 (2-3) | 1 (1-2) |
| <b>Muy grave</b> | -         | 16 (76.2) | -       | 2 (2-3) |

Evento grave= Ingreso en UCI o muerte durante el ingreso.
